# Supplementary material for: Multitask prediction of site selectivity in aromatic C–H functionalization reactions
Source: Royal Society of Chemistry journal article supplement (doi:10.1039/d0re00071j), 2020-01-01
Supplement: d0re00071j1.pdf [file d0re00071j1.pdf]

## Supporting Information

### Multitask Prediction of Site Selectivity in Aromatic C-H Functionalization Reactions

Thomas J. Struble,<sup>a‡</sup> Connor W. Coley,<sup>a‡</sup> and Klavs F. Jensen<sup>\*a</sup>  
E-mail: kfjensen@mit.edu

<sup>a</sup> Department of Chemical Engineering

<sup>‡</sup> Equal contribution

Massachusetts Institute of Technology  
77 Massachusetts Avenue, Cambridge, MA 02139.

## S1 (Additional) Materials and methods

### S1.1 Details of data set

A breakdown of the number of examples for each task in the whole dataset is provided below. The tasks are loosely categorized based on the “type” of reaction but this does not imply that the reactions with the same description share an underlying mechanism. A representative example is in the borylation category there are reactions using an organolithium reagent and examples using palladium coupling.

Table S1: Description of all C-H activation tasks used in this study. The number of examples reflects the total number, divided in an 80:10:10 split for training:validation:testing.

| Num. Examples | Description              | SMILES of other reactant             |
|---------------|--------------------------|--------------------------------------|
| 16152         | bromation                | BrBr                                 |
| 5791          | nitration                | [N+] (=O) (O) [O-]                   |
| 4569          | formylation              | CN(C)C=O                             |
| 2895          | chlorination             | ClCl                                 |
| 1311          | Friedel-Crafts acylation | CC(=O)Cl                             |
| 983           | carbonylation            | C=O                                  |
| 833           | carboxylation            | O=C=O                                |
| 768           | Friedel-Crafts acylation | CC(=O)OC(C)=O                        |
| 743           | olefination              | C=CC(=O)OCC                          |
| 743           | arylation                | Ic1ccccc1                            |
| 690           | borylation               | CC1(C)OB(B2OC(C)(C)C(C)(C)O2)OC1(C)C |
| 688           | Friedel-Crafts acylation | O=C(Cl)c1ccccc1                      |
| 659           | olefination              | C=CC(=O)OCCCC                        |
| 595           | 1,2 addition             | O=Cc1ccccc1                          |
| 573           | 1,4 addition             | C=CC(=O)OC                           |
| 558           | methylation              | CI                                   |
| 547           | silylation               | C[Si](C)(C)Cl                        |
| 513           | formylation              | COc(Cl)Cl                            |
| 487           | 1,2 addition             | C=Cc1ccccc1                          |
| 470           | 1,4 addition             | O=[N+]([O-])C=Cc1ccccc1              |
| 457           | acylation                | CC(=O)O                              |
| 454           | sulfonyl azide addition  | Cc1ccc(S(=O)(=O)N=[N+]=[N-])cc1      |
| 415           | arylation                | COc1ccc(I)cc1                        |
| 400           | arylation                | BrC1ccccc1                           |
| 394           | arylation                | OB(O)c1ccccc1                        |
| 360           | arylation                | Cc1ccc(I)cc1                         |
| 345           | 1,4 addition             | C=CC(C)=O                            |
| 333           | formylation              | C1N2CN3CN1CN(C2)C3                   |

|     |                        |                                           |
|-----|------------------------|-------------------------------------------|
| 326 | trifluoroacetylation   | <chem>O=C(OC(=O)C(F)(F)F)C(F)(F)F</chem>  |
| 315 | methylation            | <chem>CO</chem>                           |
| 285 | acetylation            | <chem>O=C1CCC(=O)O1</chem>                |
| 284 | acetylation            | <chem>O=C(Cl)CC1</chem>                   |
| 274 | sulfonylation          | <chem>Cc1ccc(S(=O)(=O)Cl)cc1</chem>       |
| 268 | thiolation             | <chem>CSSC</chem>                         |
| 262 | arylation              | <chem>N#Cc1ccc(Br)cc1</chem>              |
| 258 | acetylation            | <chem>O=C(O)C(=O)c1ccccc1</chem>          |
| 256 | arylation              | <chem>COc1ccc(Br)cc1</chem>               |
| 255 | arylation              | <chem>Cc1ccc(Br)cc1</chem>                |
| 240 | borylation             | <chem>CC1(C)OB(O)C1(C)C</chem>            |
| 236 | alkyne coupling        | <chem>CC(C)[Si](C#CBr)(C(C)C)C(C)C</chem> |
| 232 | arylation              | <chem>Nc1ccc([N+](=O)[O-])cc1</chem>      |
| 227 | stannylation           | <chem>CCCC[Sn](Cl)(CCCC)CCCC</chem>       |
| 223 | acylation              | <chem>O=C(Cl)C(=O)Cl</chem>               |
| 220 | borylation             | <chem>CC(C)OB1OC(C)(C)C(C)(C)O1</chem>    |
| 216 | 1,2 addition           | <chem>C#Cc1ccccc1</chem>                  |
| 210 | 1,2 addition           | <chem>CCOC(=O)C(=O)C(F)(F)F</chem>        |
| 209 | acylation              | <chem>O=C(O)c1ccccc1</chem>               |
| 207 | olefination            | <chem>C=CC(=O)OC(C)(C)C</chem>            |
| 204 | acylation              | <chem>CCOC(=O)C(=O)Cl</chem>              |
| 201 | diazotization          | <chem>Nc1ccccc1</chem>                    |
| 199 | 1,2 addition           | <chem>O=C(C=Cc1ccccc1)c1ccccc1</chem>     |
| 196 | arylation              | <chem>Brc1ccncc1</chem>                   |
| 191 | amination              | <chem>C1COCCN1</chem>                     |
| 191 | arylation              | <chem>Clc1ccc(I)cc1</chem>                |
| 186 | 1,2 addition           | <chem>C(#Cc1ccccc1)c1ccccc1</chem>        |
| 182 | phosphine synthesis    | <chem>ClP(c1ccccc1)c1ccccc1</chem>        |
| 178 | 1,2 addition           | <chem>CCOC(=O)C=O</chem>                  |
| 178 | arylation              | <chem>O=Cc1ccc(Br)cc1</chem>              |
| 172 | arylation              | <chem>FC(F)(F)c1ccc(Br)cc1</chem>         |
| 170 | acylation              | <chem>CCC(=O)Cl</chem>                    |
| 167 | 1,2 addition           | <chem>COc1ccc(C=O)cc1</chem>              |
| 167 | trichloroacylation     | <chem>O=C(Cl)C(Cl)(Cl)Cl</chem>           |
| 164 | alkylation             | <chem>OCc1ccccc1</chem>                   |
| 164 | alkylation             | <chem>CCOC(=O)C(F)(F)Br</chem>            |
| 163 | arylation              | <chem>O=[N+]([O-])c1ccc(Br)cc1</chem>     |
| 159 | alkylation             | <chem>C=CCBr</chem>                       |
| 159 | 1,2 addition           | <chem>CC=O</chem>                         |
| 158 | alkylation             | <chem>CN(C)CN(C)C</chem>                  |
| 156 | arylation              | <chem>FC(F)(F)c1ccc(I)cc1</chem>          |
| 155 | methylation            | <chem>CS(C)=O</chem>                      |
| 155 | amidation              | <chem>O=c1onc(-c2ccccc2)o1</chem>         |
| 155 | arylation              | <chem>CC(=O)c1ccc(Br)cc1</chem>           |
| 151 | acylation              | <chem>O=Cc1ccc(Cl)cc1</chem>              |
| 150 | methylation            | <chem>Sc1ccccc1</chem>                    |
| 149 | arylation              | <chem>CCOC(=O)c1ccc(I)cc1</chem>          |
| 147 | phosphonate synthesis  | <chem>CCO[PH](=O)OCC</chem>               |
| 147 | allylation             | <chem>C=CCOC(C)=O</chem>                  |
| 138 | alkylation             | <chem>O=S(=O)(CCl)c1ccccc1</chem>         |
| 138 | arylation              | <chem>N#Cc1ccccc1Br</chem>                |
| 135 | acylation              | <chem>O=C1OC(=O)c2ccccc21</chem>          |
| 134 | acylation (oxidative)  | <chem>Cc1ccccc1</chem>                    |
| 133 | arylation              | <chem>Cc1ccc(Cl)cc1</chem>                |
| 132 | alkylation (oxidative) | <chem>C1COCCO1</chem>                     |
| 131 | arylation              | <chem>N#Cc1ccc(I)cc1</chem>               |
| 128 | acylation              | <chem>O=C(Cl)CCCl</chem>                  |

|     |                           |                                                     |
|-----|---------------------------|-----------------------------------------------------|
| 126 | alkylation                | <chem>OC(C=Cc1ccccc1)c1ccccc1</chem>                |
| 126 | silylation                | <chem>CC[SiH](CC)CC</chem>                          |
| 125 | arylation                 | <chem>Fc1ccc(Br)cc1</chem>                          |
| 125 | acylation                 | <chem>COc1ccc(C(=O)Cl)cc1</chem>                    |
| 124 | borylation                | <chem>COB(OC)OC</chem>                              |
| 121 | 1,2 addition              | <chem>CC(=O)c1ccccc1</chem>                         |
| 120 | 1,2 addition              | <chem>O=C(C(F)(F)F)C(F)(F)F</chem>                  |
| 120 | arylation                 | <chem>Cc1ccc(B(O)O)cc1</chem>                       |
| 118 | alkylation                | <chem>OC(c1ccccc1)c1ccccc1</chem>                   |
| 117 | arylation                 | <chem>Clc1ccc(Br)cc1</chem>                         |
| 116 | acylation                 | <chem>O=C(Cl)c1ccc(Cl)cc1</chem>                    |
| 115 | alkylation                | <chem>COC(=O)C(=[N+]=[N-])C(=O)OC</chem>            |
| 114 | sulfonylation             | <chem>O=S(=O)(Cl)c1ccccc1</chem>                    |
| 113 | alkylation                | <chem>OC(C#Cc1ccccc1)c1ccccc1</chem>                |
| 112 | amination                 | <chem>O=S(=O)(c1ccccc1)N(F)S(=O)(=O)c1ccccc1</chem> |
| 111 | 1,2 addition              | <chem>O=C(c1ccccc1)c1ccccc1</chem>                  |
| 111 | phosphine oxide synthesis | <chem>O=[PH](c1ccccc1)c1ccccc1</chem>               |
| 110 | amination                 | <chem>Cc1ccc(S(=O)(=O)NN)cc1</chem>                 |
| 110 | 1,2 addition              | <chem>COC(=O)C(=O)C(F)(F)F</chem>                   |
| 109 | amination                 | <chem>CCOC(=O)N=NC(=O)OCC</chem>                    |
| 109 | acylation                 | <chem>Cc1ccc(C(=O)Cl)cc1</chem>                     |
| 108 | alkylation                | <chem>c1ccc(C2CO2)cc1</chem>                        |
| 108 | borylation                | <chem>CC(C)OB(OC(C)C)OC(C)C</chem>                  |
| 107 | acylation                 | <chem>CC(C)(C)C(=O)Cl</chem>                        |
| 107 | stannylation              | <chem>C[Sn](C)(C)Cl</chem>                          |
| 107 | 1,2 addition              | <chem>CCCC#CCCC</chem>                              |
| 106 | 1,4 addition              | <chem>O=C1C=CCCC1</chem>                            |
| 105 | 1,4 addition              | <chem>O=C1C=CCC1</chem>                             |
| 105 | isocyanate addition       | <chem>O=C=Nc1ccccc1</chem>                          |
| 104 | arylation                 | <chem>O=[N+]([O-])c1ccc(I)cc1</chem>                |
| 103 | 1,2 addition              | <chem>O=C1CCCCC1</chem>                             |
| 103 | alkylation                | <chem>COC(=O)C(=[N+]=[N-])c1ccccc1</chem>           |
| 103 | phosphonate synthesis     | <chem>CC(C)O[PH](=O)OC(C)C</chem>                   |
| 103 | arylation                 | <chem>Clc1ccccc1</chem>                             |
| 101 | acylation                 | <chem>Cc1ccc(C=O)cc1</chem>                         |
| 101 | silylation                | <chem>C[SiH](O[Si](C)(C)C)O[Si](C)(C)C</chem>       |
| 100 | alkylation                | <chem>OC12CC3CC(CC(C3)C1)C2</chem>                  |
| 100 | acylation                 | <chem>O=C(Cl)Cc1ccccc1</chem>                       |

Figure S1: Distribution of dataset (train/valid/test) by number of unique sites in the reactant

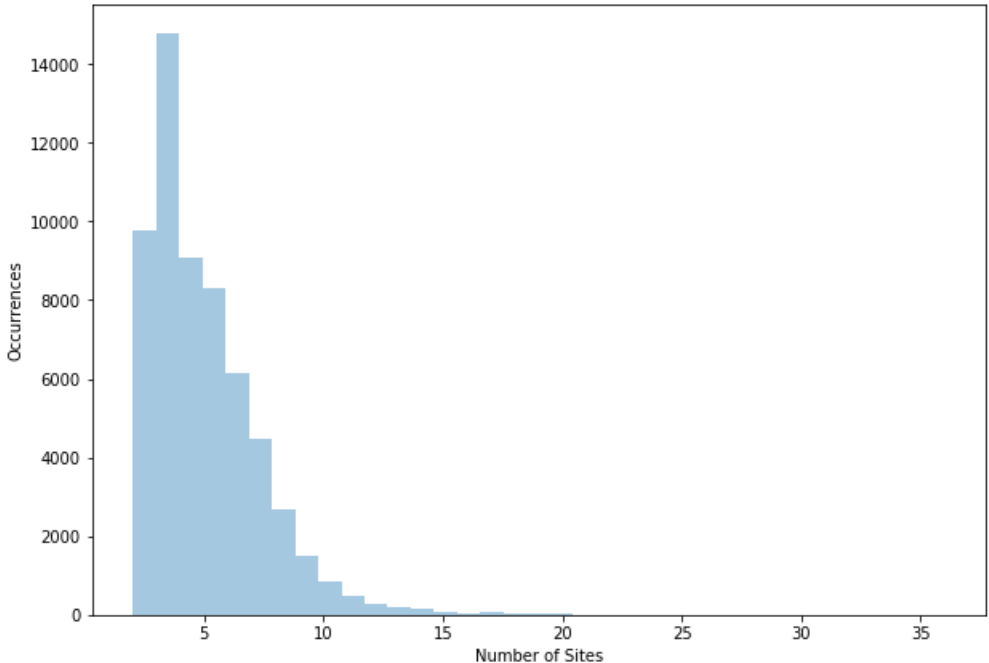

## S1.2 Details of model architecture

The description of the WLN model is presented here with minimal modification from Coley *et al.*<sup>1</sup>.

### S1.2.1 Notation

| Symbol             | Meaning                      |
|--------------------|------------------------------|
| $u, v$             | atoms                        |
| $N(v)$             | Set of atoms adjacent to $v$ |
| $\tau(\cdot)$      | ReLU activation function     |
| $\sigma(\cdot)$    | Sigmoid function             |
| $U, V, W, M, P, Q$ | learned matrices in WLN      |

### S1.2.2 Weisfeiler-Lehman Network (WLN)

Weisfeiler-Lehman Network<sup>2</sup> is a type of graph convolutional network derived from Weisfeiler-Lehman (WL) graph kernel<sup>3</sup>. The architecture is designed to embed the computations inherent in WL graph kernel to learn isomorphism invariant representation of atoms. The atom representation is computed by iteratively augmenting the representation of adjacent atoms. Specifically, each atom  $v$  is initialized with a feature vector  $f_v$  indicating its atomic number, formal charge, degree of connectivity, explicit and implicit valence, and aromaticity. Each bond  $(u, v)$  is associated with a feature vector  $f_{uv}$  indicating its bond order and ring status. In each iteration, we updated atom representations as follows:

$$f_v^l = \tau \left( U_1 f_v^{l-1} + U_2 \sum_{u \in N(v)} \tau(V_1 f_u^{l-1} + V_2 f_{uv}) \right) \quad (1 \leq l \leq L)$$

where  $f_v^l$  is the atom representation at the  $l$ th iteration, initialized with  $f_v^0 = f_v$  atom features.  $U_1, U_2, V_1, V_2$  are model parameters to be learned, shared across all  $L$  iterations. The final local atom representations are computed as

$$c_v = \sum_{u \in N(v)} W_1 f_u^L \odot W_2 f_{uv} \odot W_3 f_v^L$$

We refer the reader to 2 for more details about the mathematical intuition and justification of the WLN.

### S1.2.3 Attention Mechanism

The atom embedding  $c_v$  only record local chemical environment, namely atoms and bonds accessible within  $L$  steps from atom  $v$ . Even if  $L$  were very large,  $c_v$  could not encode any information about other reactant molecules, as information cannot be propagated between two reactant molecules that are disconnected. We argue that it is important to enable information to flow between distant or disconnected atoms. For example, the reaction center may be influenced by certain reagents that are disconnected from reactant molecules. In this case, it is necessary for atom representation  $c_v$  to encode such distal chemical effects. Therefore, we propose to enhance the model in previous section with an attention mechanism.<sup>4</sup>

Specifically, let  $\alpha_{vz}$  be the attention score of atom  $v$  upon atom  $z$ . The "global" atom representation  $\tilde{c}_v$  of atom  $v$  is calculated as the weighted sum of all reactant atoms where the weight comes from the attention module:

$$\alpha_{vz} = \sigma(u^T \tau(P_a c_v + P_a c_z + P_b b_{vz}))$$

$$\tilde{c}_v = \sum_z \alpha_{vz} c_z$$

The attention score is computed based on "local" atom representations  $c_v$  from WLN.  $\sigma$  is the sigmoid activation function.

### S1.2.4 Reaction Site Prediction

The WLN is trained to predict the likelihood that a specific atom will be the favored site in a specific C-H activation reaction. We denote this likelihood as  $p_{t,v}$ , where  $t$  is the prediction task and  $v$  is the atom. The likelihoods are not normalized within a molecule to sum to one, but instead are computed using an elementwise sigmoid action  $\sigma$  to produce a vector  $p_v$  across prediction tasks.

$$p_v = \sigma(Q \tau(M_a \tilde{c}_v + P_a c_v))$$

The above neural network is jointly optimized with the WLN to minimize the sigmoid cross entropy loss for each reaction example

$$-\sum_t \sum_v y_{t,v} \log p_{t,v} + (1 - y_{t,v}) \log(1 - p_{t,v})$$

where  $y_{t,v} = 1$  iff  $v$  is the atom undergoing C-H activation for task  $t$ .

## S1.3 Inclusion of reagents

Including the reagents as part of the input was tested to see if the accuracy of the model could be improved. The data was further filtered by removing any atom mapping from reagents, and confirming all of the recorded reagents can be parsed by RDKit. The benefit would be that better accuracy could be achieved but with the trade-off of the end user having to provide reagents at prediction time. The model performed marginally better with the reagents included but still do not capture drastic changes in selectivity based on very specific conditions. However, care should be taken to compare these results directly to the model that does not include reagents. The data set that includes reagents has multiple reactions that have the same outcome but use different reagents and thus is slightly different than the data set used in the multitask model without reagents.

Table S2: Results for inclusion of reagents in training

| Model         | Validation Set <sup>a</sup> (%) | Test Set <sup>a</sup> (%) |
|---------------|---------------------------------|---------------------------|
| With Reagents | 89/94                           | 87/92                     |

<sup>a</sup> Reported as top 1 accuracy / mean reciprocal rank

## S2 RegioSQM comparison

RegioSQM predictions include all sites that are within a threshold of the lowest energy carbocation conformer (in this case 1 kcal/mol) which allows for multiple predictions in each molecule. The WLN methodology accuracy is based on the top 1 atom score which cannot be directly compared. An analysis is performed where the accuracy is based on how

many sites that that RegioSQM predicts. For example if RegioSQM predicts 3 sites that are all within 1 kcal/mol of the lowest energy conformer, then the accuracy for the WLN is relaxed to if the top 3 predictions include the correct site. The results are grouped into two categories 1) direct comparison of the top 1 predictions, filtered to include only examples where RegioSQM predicts one site, and 2) comparison of the top 2 or 3 sites for both methodologies when RegioSQM predicts multiple sites. Also included in Table S3 in the column 2 or 3 sites, is the top 1 accuracy of that subset for the WLN. Interestingly, the top 1 accuracy is not much lower than when RegioSQM has 2 or 3 sites it had chosen.

Table S3: Comparison to RegioSQM<sup>5</sup> on a random subset of 494 bromination reactions from our test set. Performance is divided into two columns according to the number of sites RegioSQM believes to be equally likely.

|                       | 1 site <sup>a</sup> (%) | 2 or 3 sites <sup>a</sup> (%)        | Time (12 CPU's) |
|-----------------------|-------------------------|--------------------------------------|-----------------|
| RegioSQM <sup>5</sup> | 86.7                    | 74.2                                 | >10 days        |
| WLN                   | 87.9                    | 71.0 <sup>b</sup> /84.7 <sup>c</sup> | 6.3s            |

<sup>a</sup>Number of sites predicted by RegioSQM, <sup>b</sup>Reported as top 1 accuracy, <sup>c</sup>Reported as top 2 or 3 accuracy

### S3 (Additional) Results

Initial hyperparameter search is shown in **Table S4**. Intermediate values between entries 1 and 2 (hidden size of 300, learning rate of 0.003, and depth of 5) were chosen for further comparison between different model architectures and is outlined in **Table S5**. Performance is also broken down by number of available symmetric reaction sites in the molecule (the data distribution broken down by number of sites is shown in **Figures S2** and **S3**. Batch size did not impact accuracy, so for the hyperparameter search, the batch size was set to 20 and the data was randomly shuffled at the beginning of each epoch.

Table S4: Additional hyperparameter optimization

| entry | WLN depth | hidden | learning rate | multitask | validation accuracy (%) |
|-------|-----------|--------|---------------|-----------|-------------------------|
| 1     | 5         | 512    | 0.00100       | True      | 86.6                    |
| 2     | 5         | 256    | 0.00050       | True      | 86.2                    |
| 3     | 4         | 512    | 0.00050       | True      | 85.9                    |
| 4     | 3         | 512    | 0.00050       | True      | 85.7                    |
| 5     | 3         | 512    | 0.00100       | True      | 85.6                    |
| 6     | 4         | 256    | 0.00050       | True      | 85.5                    |
| 7     | 5         | 256    | 0.00100       | True      | 85.5                    |
| 8     | 4         | 512    | 0.00100       | True      | 85.4                    |
| 9     | 3         | 256    | 0.00100       | True      | 85.3                    |
| 10    | 5         | 512    | 0.00009       | True      | 85.3                    |
| 11    | 4         | 256    | 0.00100       | True      | 85.3                    |
| 12    | 5         | 128    | 0.00100       | True      | 85.1                    |
| 13    | 4         | 128    | 0.00050       | True      | 85.1                    |
| 14    | 5         | 512    | 0.00050       | True      | 84.9                    |
| 15    | 3         | 256    | 0.00050       | True      | 84.9                    |
| 16    | 5         | 128    | 0.00050       | True      | 84.8                    |
| 17    | 4         | 64     | 0.00100       | True      | 83.8                    |
| 18    | 4         | 128    | 0.00100       | True      | 83.8                    |
| 19    | 4         | 512    | 0.00009       | True      | 83.6                    |
| 20    | 3         | 128    | 0.00100       | True      | 83.4                    |
| 21    | 5         | 64     | 0.00100       | True      | 83.1                    |
| 22    | 3         | 128    | 0.00050       | True      | 82.9                    |
| 23    | 5         | 64     | 0.00050       | True      | 81.6                    |
| 24    | 3         | 512    | 0.00009       | True      | 81.5                    |
| 25    | 5         | 256    | 0.00009       | True      | 81.3                    |
| 26    | 4         | 64     | 0.00050       | True      | 81.2                    |
| 27    | 3         | 64     | 0.00100       | True      | 81.2                    |
| 28    | 4         | 256    | 0.00009       | True      | 80.2                    |
| 29    | 4         | 256    | 0.01000       | True      | 80.1                    |
| 30    | 3         | 512    | 0.01000       | True      | 79.9                    |
| 31    | 4         | 512    | 0.01000       | True      | 79.9                    |
| 32    | 5         | 64     | 0.01000       | True      | 79.7                    |
| 33    | 5         | 512    | 0.01000       | True      | 79.3                    |
| 34    | 5         | 256    | 0.01000       | True      | 78.8                    |
| 35    | 3         | 64     | 0.00050       | True      | 78.8                    |
| 36    | 3         | 256    | 0.01000       | True      | 78.1                    |
| 37    | 5         | 128    | 0.00009       | True      | 78.0                    |
| 38    | 3         | 64     | 0.01000       | True      | 77.3                    |
| 39    | 5         | 128    | 0.01000       | True      | 77.1                    |
| 40    | 4         | 64     | 0.01000       | True      | 75.9                    |
| 41    | 4         | 128    | 0.00009       | True      | 75.9                    |
| 42    | 4         | 128    | 0.01000       | True      | 75.4                    |
| 43    | 3         | 256    | 0.00009       | True      | 75.2                    |
| 44    | 3         | 128    | 0.01000       | True      | 72.6                    |
| 45    | 5         | 64     | 0.00009       | True      | 71.8                    |
| 46    | 3         | 128    | 0.00009       | True      | 71.3                    |
| 47    | 4         | 64     | 0.00009       | True      | 70.0                    |
| 48    | 3         | 64     | 0.00009       | True      | 66.3                    |

Table S5: Additional results

| Model <sup>b</sup> | Baseline  | Hidden size | Added Features | Validation accuracy <sup>b</sup> (%) |
|--------------------|-----------|-------------|----------------|--------------------------------------|
| Single-task        | yes       | 300         | Yes            | 46.7                                 |
| Single-task        | no        | 100         | no             | 84.4                                 |
| Single-task        | no        | 300         | no             | 86.4                                 |
| Single-task        | no        | 100         | yes            | 83.3                                 |
| Single-task        | no        | 300         | yes            | 84.6                                 |
| Multitask          | yes       | 300         | no             | 21.3                                 |
| Multitask          | yes       | 300         | yes            | 49.0                                 |
| <b>Multitask</b>   | <b>no</b> | <b>300</b>  | <b>no</b>      | <b>87.0</b>                          |
| Multitask          | no        | 300         | yes            | 87.6                                 |

<sup>a</sup>A depth of 5 was used for the WLN with a lr of 0.003. <sup>b</sup>Reported as top 1 accuracy.

Figure S2: Performance of the validation set by number of sites

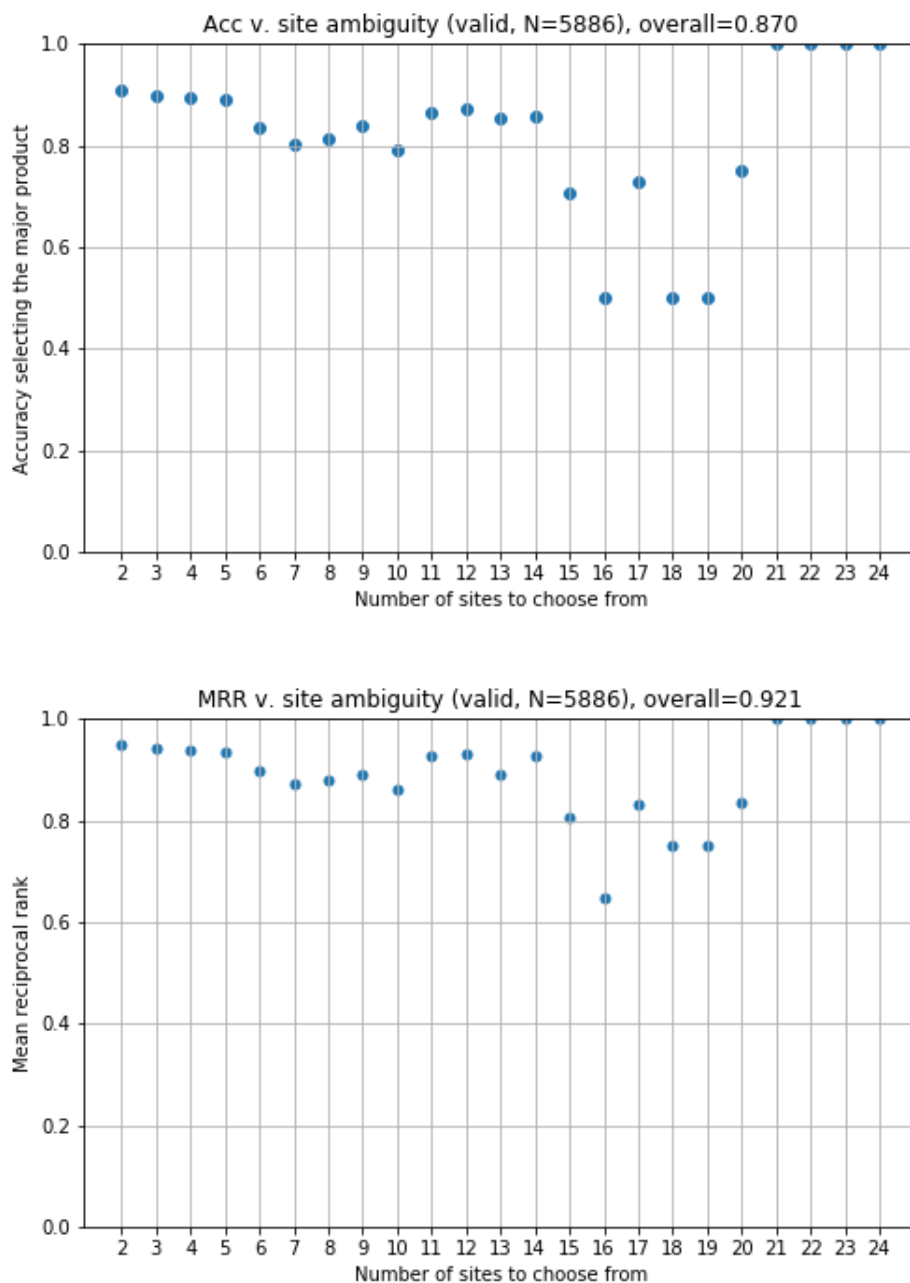



Figure S3: Performance of the test set by number of sites

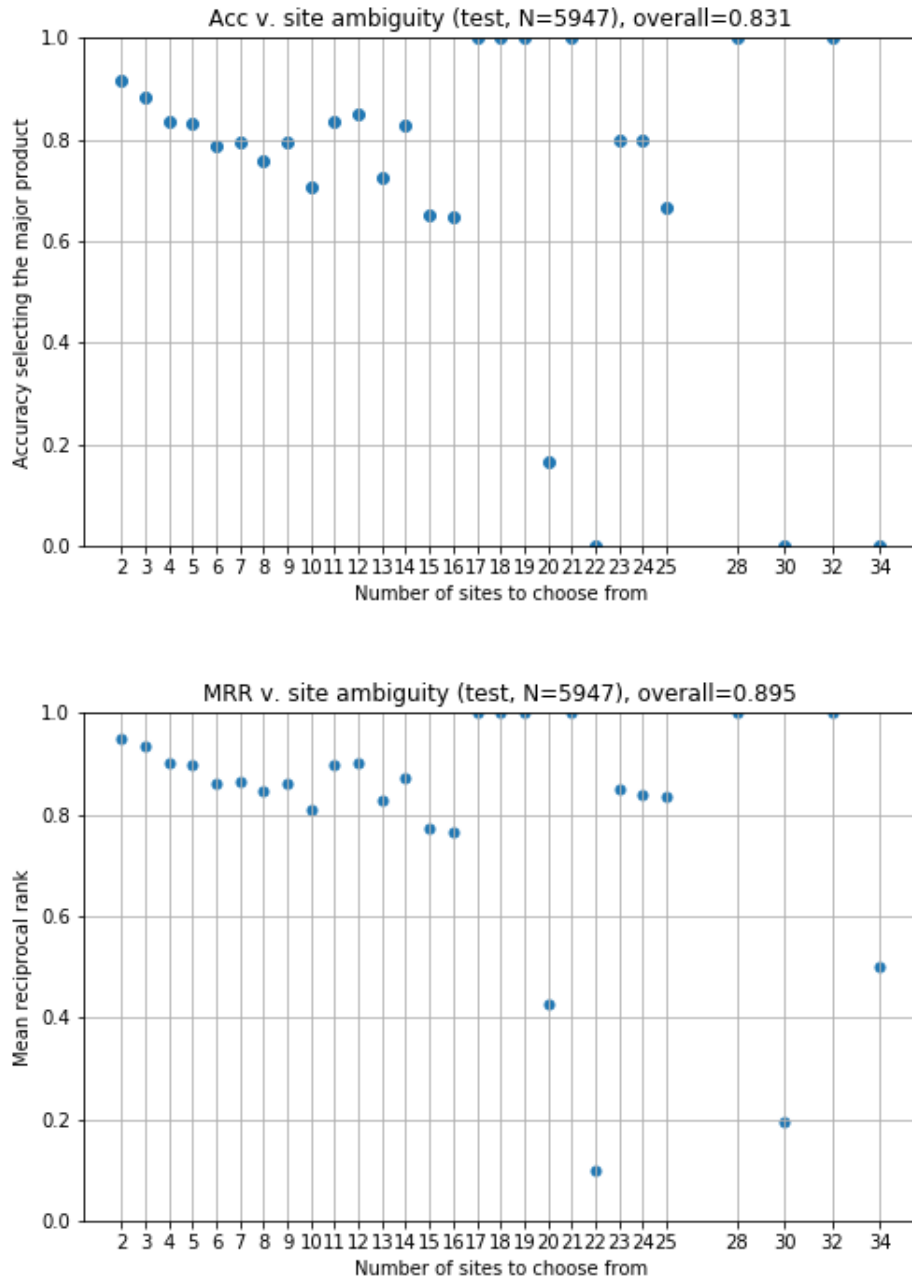

### S3.1 Examples of predictions

One possible application of the multitask model is in late stage functionalization of aromatics. The model would allow a chemist to view some reactions that give a high probability to be site selective. However, these scores are not indicative of reaction yield, only the probability for that site to be functionalized. The synthesis workflow would still require chemists to decide whether protections/deprotections would be needed to avoid functional group interactions with catalysts or reagents. The first example in **Figure S4** shows that it **S1** would be possible to access two different sites with various reactions. Also shown are examples that would not give selectivity or have low probability of accessing any site. If a chemist wants another site on **S1** to be functionalized then they could go one step back in the synthetic sequence and run selectivity predictions. **Figure S5** shows one retrosynthetic suggestion that breaks the molecule into **S2** and another site on the molecule could be selectively functionalized. The final example in **Figure S6** demonstrates again that on **S3** there are some reactions that give high probability for the highlighted site and there are often many that give a low probability which would likely not be routes to be executed.

Figure S4: Example 1

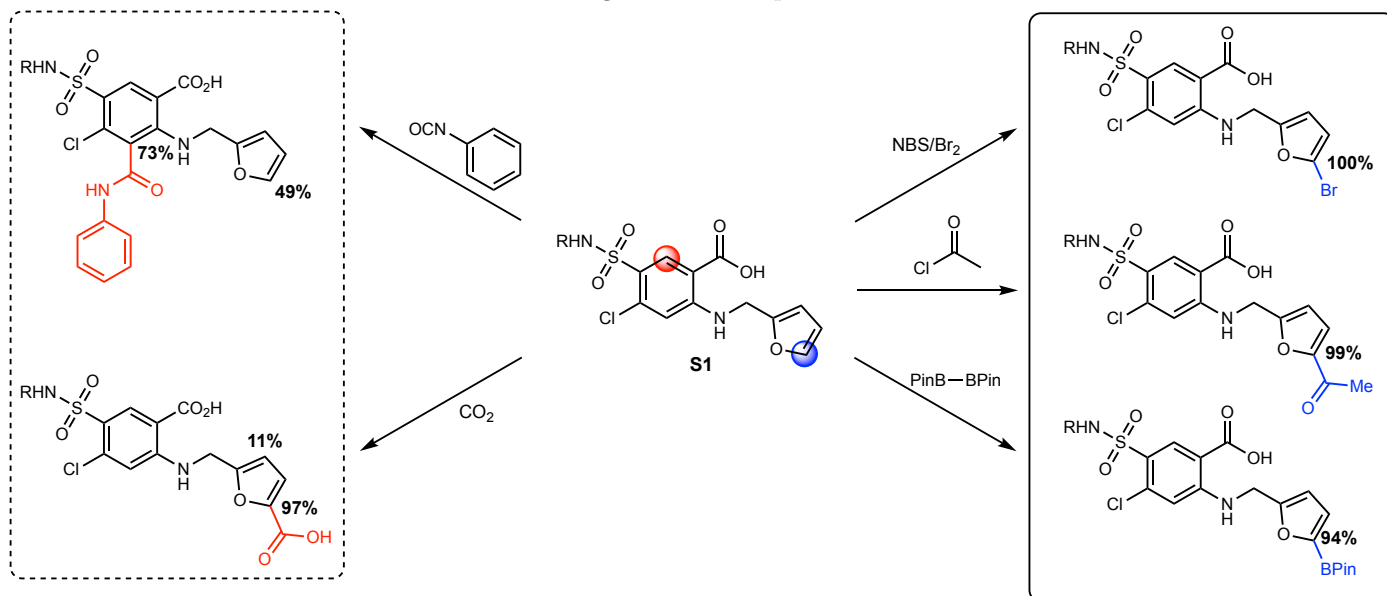

Figure S5: Example after one step retrosynthesis

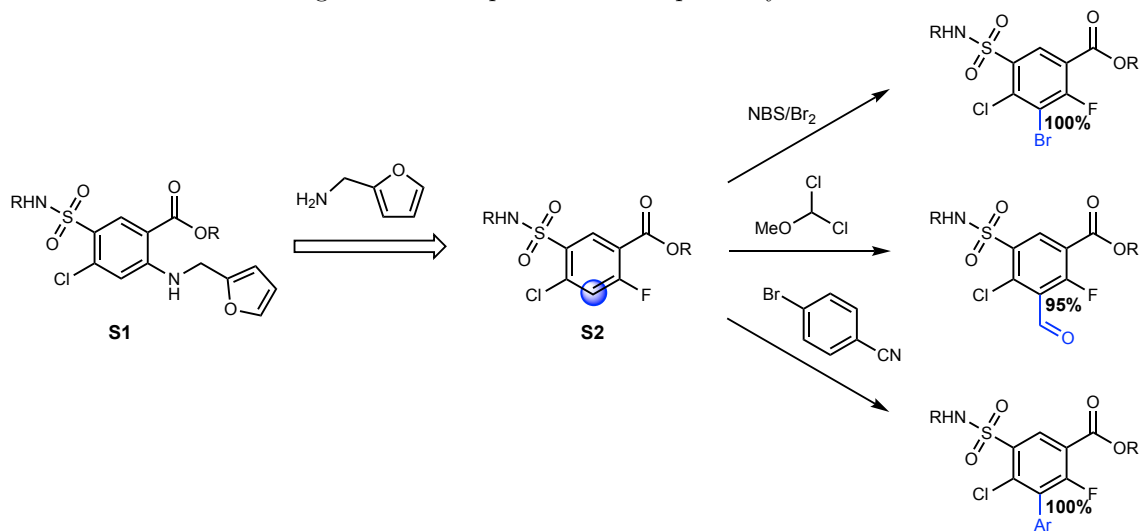

Figure S6: Example 2

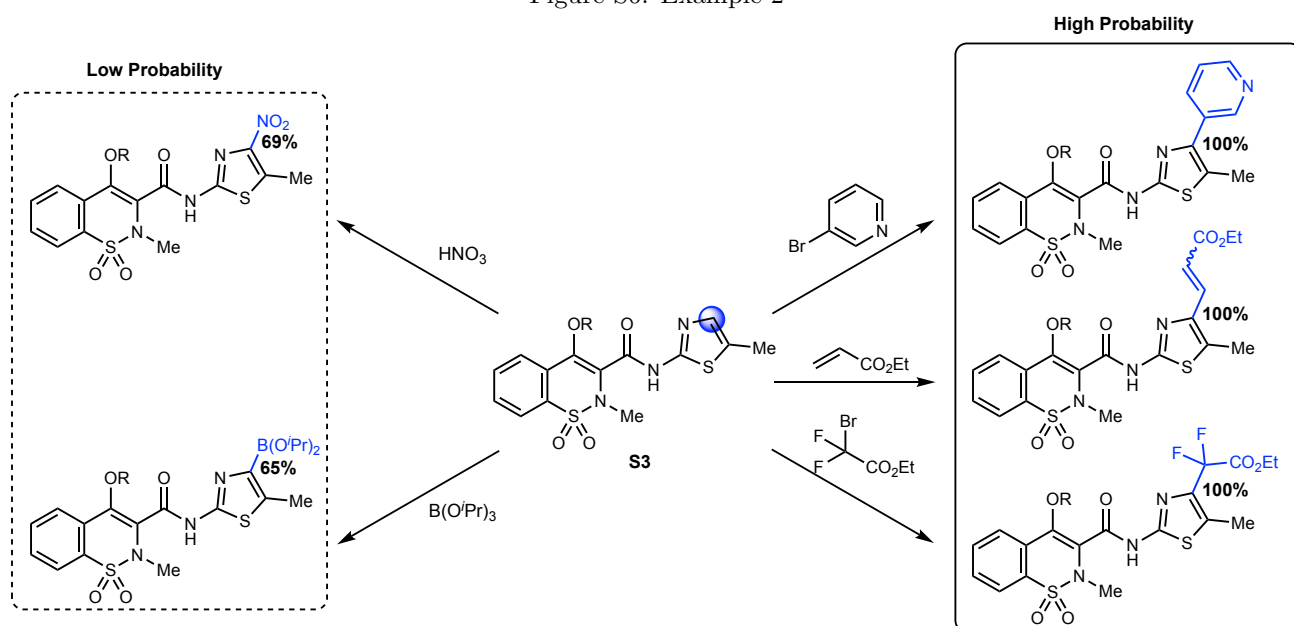

### S3.2 Examples of failed predictions

Below are examples of failed predictions. There are 9 tasks that have accuracy below 50%. **Table S6** shows the tasks that have poor test accuracy. These low accuracies are generally attributed to the time-split validation we use for the dataset. For example, for the task CCOC(=O)C(F)(F)Br which has 0% accuracy on the test set, all 17 test examples are from a substrate scope where a new catalyst/ligand system was developed to alter selectivity. Examples of failed predictions are grouped by their task and drawn below.

| Task                           | $N_{\text{test}}$ | top-1 accuracy (%) |
|--------------------------------|-------------------|--------------------|
| <chem>CCOC(=O)C(F)(F)Br</chem> | 17                | 0.0                |
| <chem>O=C=Nc1ccccc1</chem>     | 11                | 9.1                |
| <chem>CC(=O)c1ccccc1</chem>    | 13                | 15.3               |
| <chem>C#Cc1ccccc1</chem>       | 22                | 36.3               |
| <chem>OB(O)c1ccccc1</chem>     | 40                | 37.5               |
| <chem>CC(=O)O</chem>           | 46                | 43.4               |
| <chem>C=Cc1ccccc1</chem>       | 49                | 44.9               |
| <chem>C=CC(C)=O</chem>         | 35                | 45.7               |
| <chem>Cc1ccc(B(O)O)cc1</chem>  | 12                | 50.0               |

Figure S7: Failed predictions for task CCOC(=O)C(F)(F)Br. Reaxys ID's A) 44846829 B) 44846838 C) 44846844 D) 44846850 E) 44846862

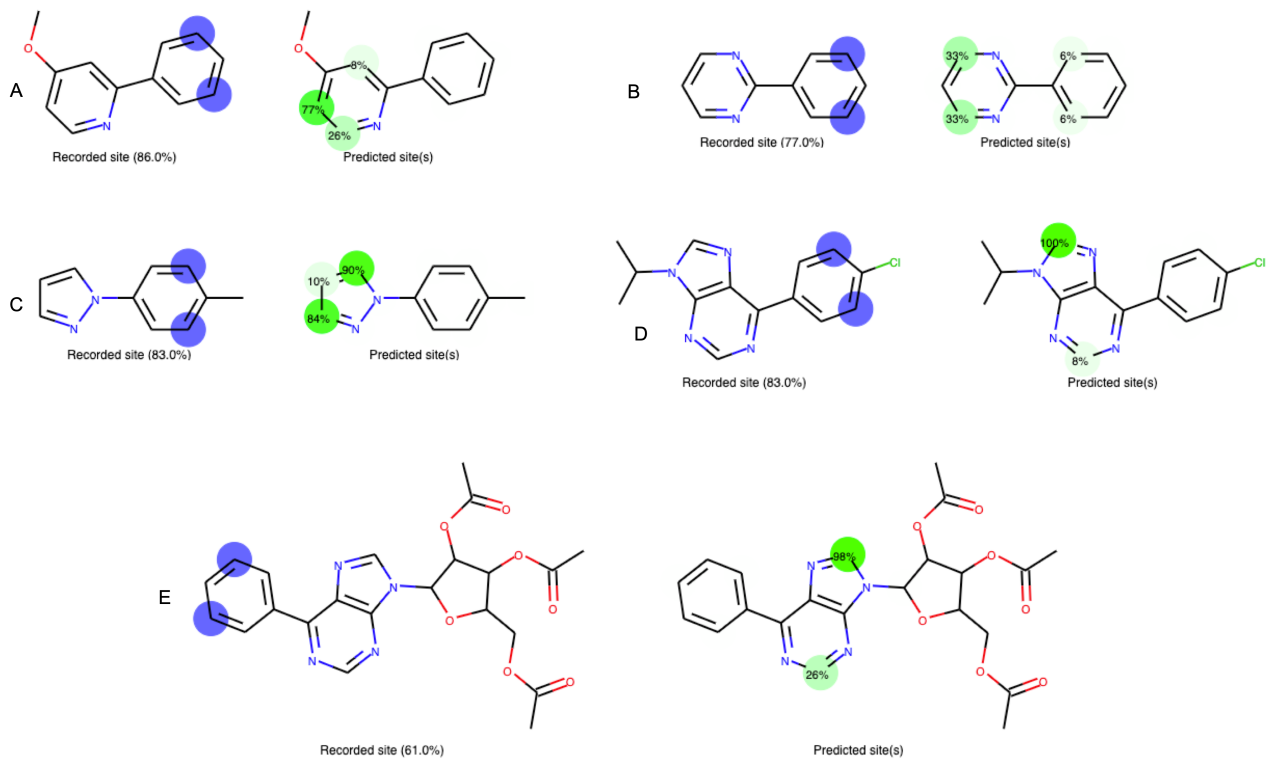

Figure S8: Failed predictions for task O=C=Nc1ccccc1. Reaxys ID's A) 44164716 B) 44164728 C) 44164741

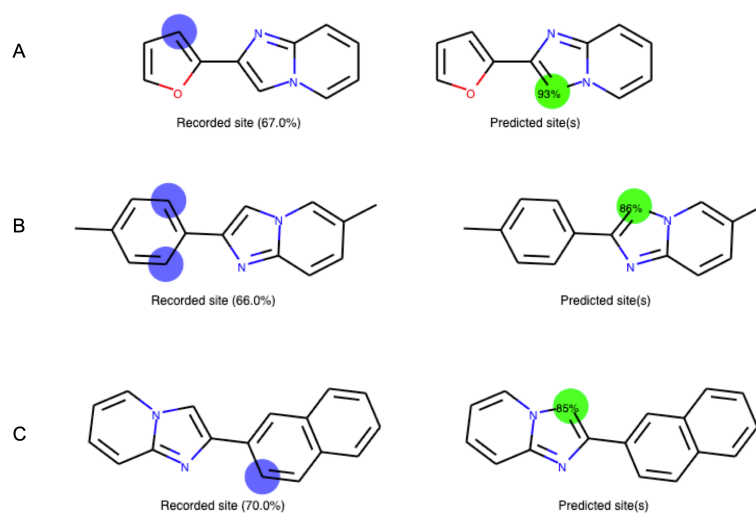

Figure S9: Failed predictions for task CC(=O)c1ccccc1. Reaxys ID's A) 42571625 B) 43419010 C) 43419015 D) 43419013

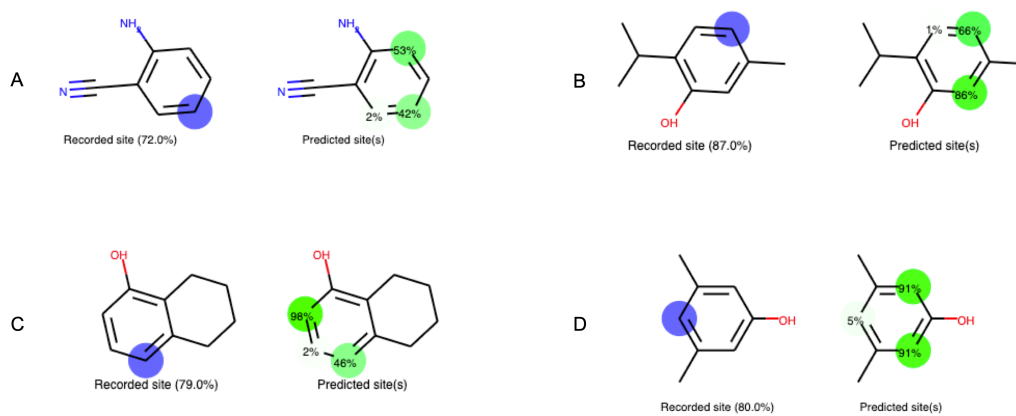

Figure S10: Failed predictions for task C#Cc1ccccc1. Reaxys ID's A) 44761859 B) 43805454 C) 43420046 D) 42092979

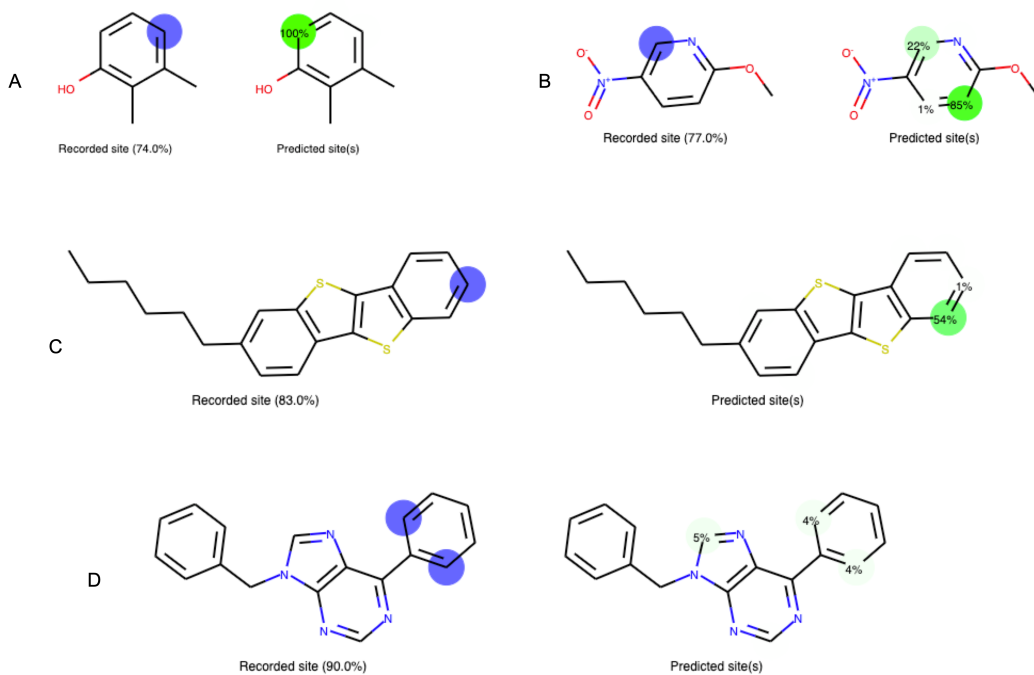

Figure S11: Failed predictions for task OB(O)c1ccccc1. Reaxys ID's A) 43473813 B) 43905584 C) 44346055

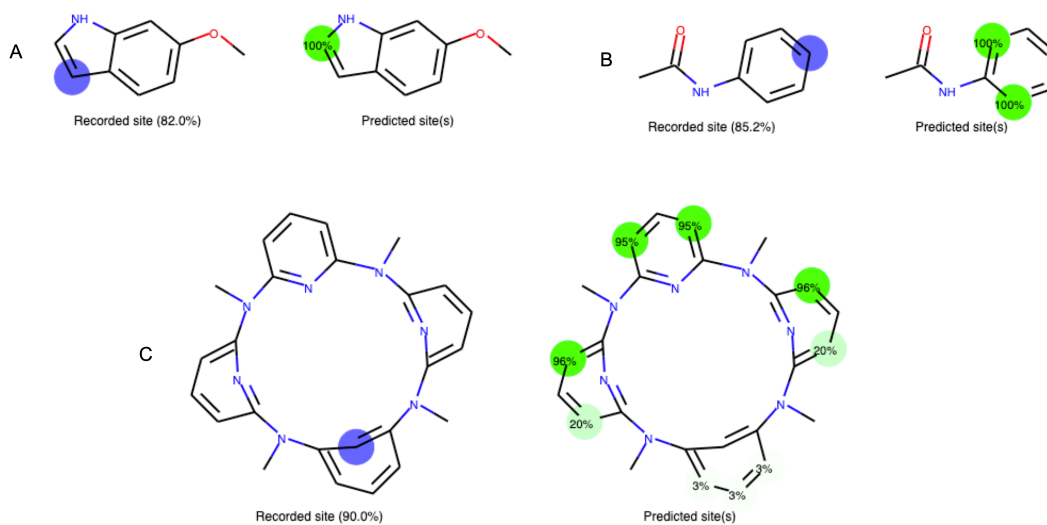

Figure S12: Failed predictions for task  $CC(=O)O$ . Reaxys ID's A) 44326647 B) 44447392 C) 44461717

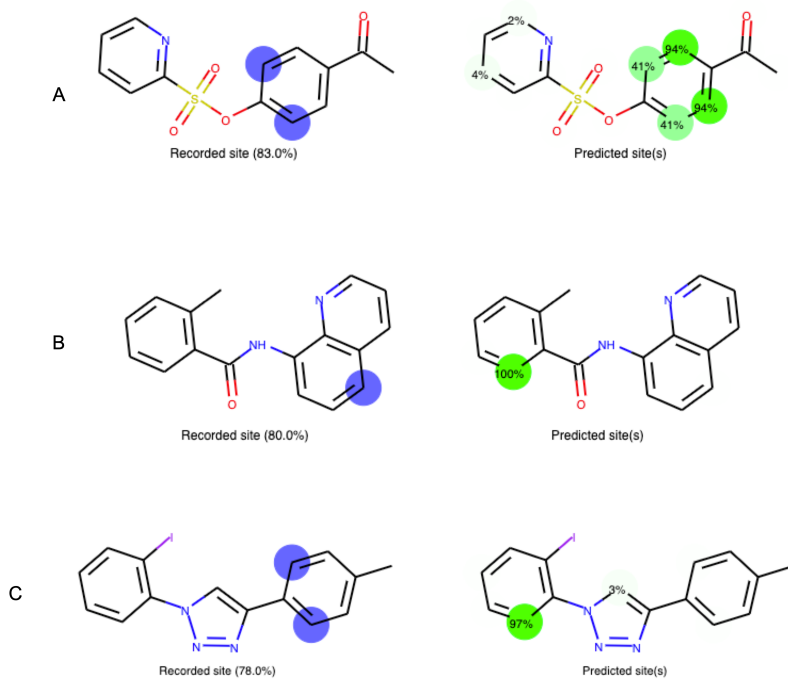

Figure S13: Failed predictions for task  $C=Cc1cccc1$ . Reaxys ID's A) 42799511 B) 43106440 C) 43644703 D) 44151514

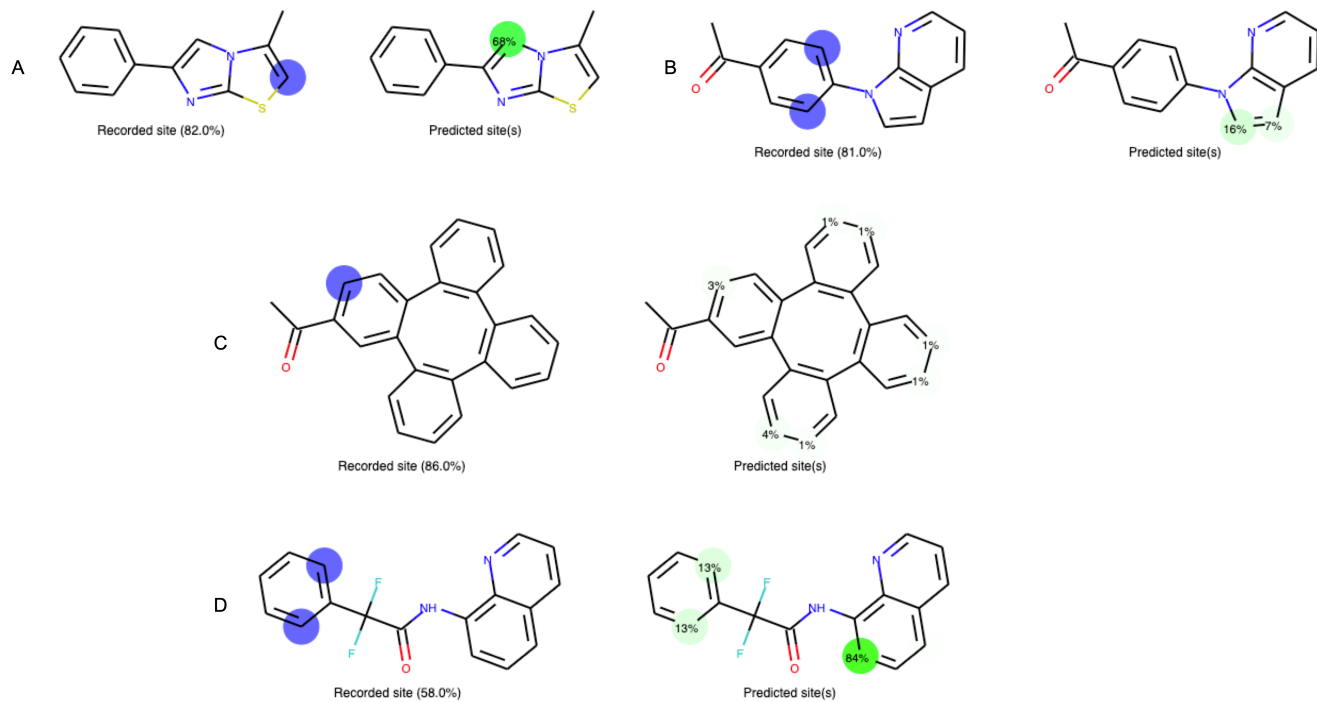

Figure S14: Failed predictions for task  $C=CC(C)=O$ . Reaxys ID's A) 35555246 B) 37544015 C) 40982653

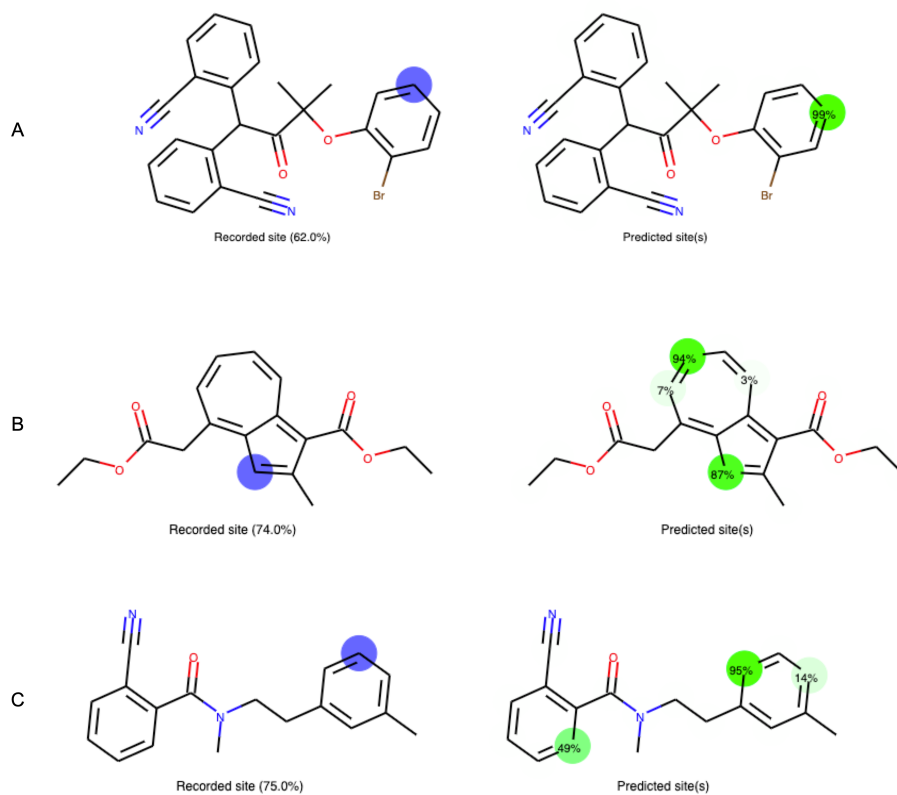

Figure S15: Failed predictions for task  $Cc1ccc(B(O)O)cc1$ . Reaxys ID's A) 44346052 B) 44346091

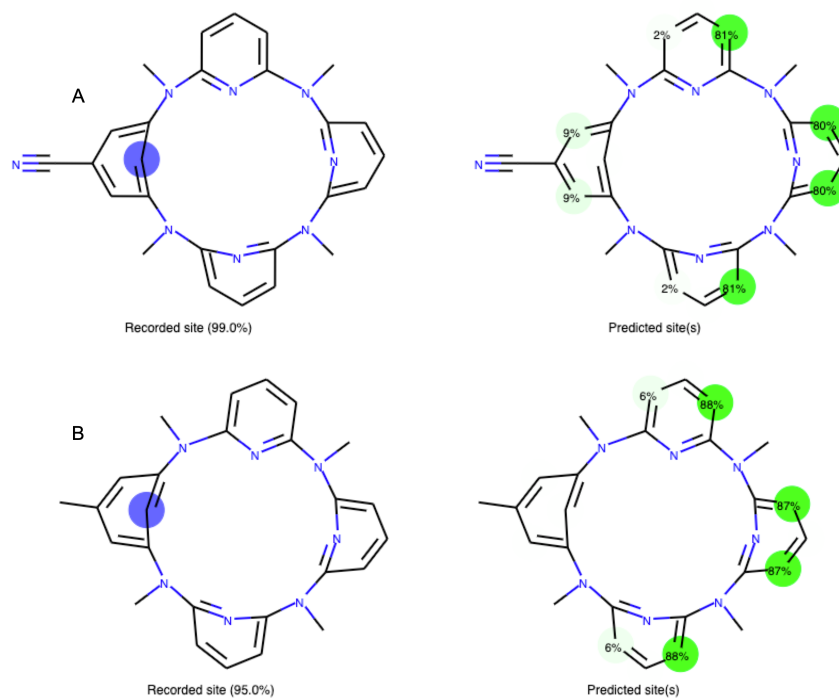



## References

- [1] C. W. Coley, W. Jin, L. Rogers, T. F. Jamison, T. S. Jaakkola, W. H. Green, R. Barzilay and K. F. Jensen, *Chemical Science*, 2019, **10**, 370–37.
- [2] T. Lei, W. Jin, R. Barzilay and T. S. Jaakkola, ICML, 2017.
- [3] N. Shervashidze, P. Schweitzer, E. J. van Leeuwen, K. Mehlhorn and K. M. Borgwardt, *Journal of Machine Learning Research*, 2011, **12**, year.
- [4] D. Bahdanau, K. Cho and Y. Bengio, *CoRR*, 2014, **abs/1409.0473**, year.
- [5] J. C. Kromann, J. H. Jensen, M. Kruszyk, M. Jessing and M. Jørgensen, *Chemical Science*, 2017, **9**, 660–665.
